15 **Abstract**

16 Global change may induce changes in savanna and forest distributions, but the dynamics of these  
17 changes remain unclear. Classical biome theory suggests that climate is predictive of biome  
18 distributions, such that shifts will be continuous and reversible. This view, however, cannot  
19 explain a widely observed mismatch between climate and tree cover, which some argue results  
20 from fire-vegetation feedbacks maintaining savanna and forest as bistable states, such that,  
21 instead, shifts will be discontinuous and irreversible. This bistable model, however, cannot  
22 reproduce the spatial aggregation of biomes. Here, we suggest that both models are limited in  
23 that they ignore spatial processes, such as dispersal. We examine the contributions of dispersal to  
24 determining savanna and forest distributions using a reaction-diffusion model, comparing results  
25 qualitatively to empirical savanna and forest distributions in Africa. The diffusion model induces  
26 spatially aggregated distributions, separated by a stable savanna-forest boundary. The  
27 equilibrium position of that boundary depends not only on precipitation but also on the curvature  
28 of precipitation contours with some history dependence (although less than in the bistable  
29 model). This model predicts different dynamics in response to global change: the boundary  
30 continuously tracks climate, recovering following disturbances, unless remnant biome patches  
31 are too small.

## 32 **Introduction**

33           Climate and land use change are expected to result in large-scale shifts in global  
34 vegetation patterns (Aleman et al. 2016; Loarie et al. 2009; Malcolm et al. 2002; Salazar et al.  
35 2007), leading to loss of biodiversity and ecosystem services that are vital for human livelihoods  
36 (Daily 1997). However, biosphere responses to changing climate and land use are uncertain. This  
37 uncertainty stems from uncertainty in what determines global biome patterns; current biome  
38 distribution models are unable to explain even simple empirical features of today's vegetation  
39 patterns. Predicting changes in biome distributions with respect to global change thus requires a  
40 better understanding of the drivers and the mechanisms by which these drivers shape global  
41 biome patterns.

42           Conceptually, the classical theory suggests that climate is the fundamental determinant of  
43 vegetation pattern and that there is a one-to-one match between climate and biome (Holdridge  
44 1947; von Humboldt and Bonpland 1807; Whittaker 1970), such that biomes continuously track  
45 changes in climate through space. Thus, under the classical view, biome shifts are continuous  
46 and reversible, and as such, relatively predictable. An alternative viewpoint, supported by both  
47 field (Dantas et al. 2016) and remote-sensing approaches (Hirota et al. 2011; Staver et al. 2011a)  
48 suggests that a single climate can support multiple vegetation types, which are differentiated  
49 instead by other ecological processes including chronic fires (Bond et al. 2005; Staver et al.  
50 2011a; Staver et al. 2011b). Savanna and forest may be a classic example; fire experiments have  
51 repeatedly shown that frequent fires can maintain savanna in regions where a closed canopy  
52 forest is climatically possible (Swaine et al. 1992; Trapnell 1959; Veenendaal et al. 2018).  
53 Simple theoretical models that incorporate both climate and fire suggest that savanna and forest  
54 may be bistable, with substantial hysteresis in biome patterns (Beckage et al. 2009; Staver et al.  
55 2011b; Staver and Levin 2012). In this second scenario, unlike the classical theory, vegetation  
56 responses to changing climate and land use may be large and irreversible, and therefore difficult  
57 to foresee.

58           The bistable theory, however, has its limitations as well. Although the mean-field bistable  
59 models can mechanistically explain the overlap in the climatic ranges over which savanna and  
60 forest occur (Beckage et al. 2009; Staver and Levin 2012), they cannot be used to describe  
61 spatial patterning of biomes. Most notably, they miss obvious spatial features of savanna and  
62 forest distributions: savannas are found near other savannas and forests near other forests, with a

63 distinct biogeographic boundary separating the two biomes (Aleman and Staver 2018). This  
64 spatial aggregation is not an obvious outcome of mean-field models, unless they invoke an  
65 additional assumption that the historical or paleo-distributions of savanna and forest are spatially  
66 structured by some extrinsic process (see Aleman and Staver 2018) (*e.g.*, paleoclimate).

67 An alternative explanation could be that some spatial process at the savanna-forest  
68 ecotone may spatially aggregate savanna and forest. For instance, studies show that seed  
69 dispersal from forest patches can allow recovery of nearby derived savannas (Holl et al. 2000;  
70 Puyravaud et al. 1994) by clumping fragmented forest patches into bigger forest aggregates.  
71 Thus, dispersal could potentially explain the observed spatial aggregation of savanna and forest.  
72 However, only a handful of theoretical studies (Favier et al. 2004; van de Leemput et al. 2015;  
73 Wuyts et al. 2018) have explicitly considered the role of dispersal in determining biome patterns  
74 at relevant spatial scales.

75 The problem should be tractable, however, as dispersal is among the best-studied spatial  
76 ecological processes. Traditionally, dispersal in ecology is has been studied via  
77 reaction-diffusion equations. These equations offer a simple and analytically tractable way to  
78 incorporate dispersal in modeling dynamics of populations at large spatial scales (Levin 1992;  
79 Skellam 1951). Theoretical work on one-dimensional reaction-diffusion models shows that  
80 coupling diffusion with a bistable model (van de Leemput et al. 2015; Wuyts et al. 2018) can  
81 yield spatially aggregated biome distributions, separated by a stable savanna-forest boundary.  
82 Moreover, the one-dimensional reaction-diffusion model behaves, dynamically, like the classical  
83 biome theory: savanna and forest distributions continuously track changes in climate and  
84 recovers to equilibrium following perturbations. Unfortunately, this one-dimensional diffusion  
85 model (van de Leemput et al. 2015; Wuyts et al. 2018) also reverts to the main drawback of the  
86 classical biome theory: it, too, fails to reproduce the widely observed overlap in the climatic  
87 ranges over which savanna and forest biomes occur (Hirota et al. 2011; Staver et al. 2011a).

88 One obvious avenue for exploration is that these models that couple diffusion to models  
89 for savanna-forest dynamics treat the landscape as one-dimensional (1D) (van de Leemput et al.  
90 2015; Wuyts et al. 2018), whereas, in reality, savanna and forest dynamics play out on  
91 two-dimensional (2D) landscapes. Going from 1D to 2D often gives rise to new dynamical  
92 features, such as motion by mean-curvature (Allen and Cahn 1979; Chen 1992; Evans et al.  
93 1992; Gandhi et al. 1999; Keener 1986; Merriman et al. 1992; Tyson and Keener 1988), that

94 could fundamentally change the dynamics of boundaries and thus their equilibrium distributions.  
95 Here, we address this directly by considering a model that couples the bistable mean-field  
96 vegetation structure with a diffusion process in two dimensions. In particular, we ask (i) whether  
97 seed dispersal, approximated as a two-dimensional diffusion process could contribute to spatial  
98 aggregation of savanna and forest biomes at continental scales; (ii) if yes, what then determines  
99 the equilibrium position of the savanna-forest boundary, and (iii) how this impacts the resilience  
100 of savanna and forest biomes to perturbations and global change. Finally, (iv) we empirically test  
101 some of the key analytical predictions of our 2D reaction-diffusion model using remotely sensed  
102 biome (Hansen et al. 2013) and climate patterns (Huffman and Bolvin 2013) in Sub-Saharan  
103 Africa.

104

## 105 **Model Description**

106 Here, we present a reaction-diffusion model of savanna and forest biomes that consists of  
107 two parts: the reaction term that determines how fire interacts with vegetation and climate, and  
108 the diffusion term that represents seed dispersal. Here, we first describe the reaction term, and  
109 then, following, the diffusion term.

110 In savanna and forest ecosystems, fire exerts strong control over tree cover (Bond et al.  
111 2003; Bond et al. 2005) via feedbacks with vegetation. In a low tree-cover landscape, fire  
112 spreads readily in the landscape (Archibald et al. 2009; Staver and Levin 2012) because sparse  
113 tree cover promotes the formation of a continuous grass layer (Archibald et al. 2009;  
114 Hennenberg et al. 2006; Pueyo et al. 2010), in turn limiting the density of trees in the landscape  
115 (Higgins et al. 2000; Prior et al. 2010; Staver et al. 2009). Meanwhile, dense tree cover shades  
116 out grasses, resulting in a discontinuous grass layer that impedes fire spread (Archibald et al.  
117 2009; Hennenberg et al. 2006; Pueyo et al. 2010). Here, we capture these two alternative  
118 feedbacks using a step fire-mortality function  $\phi$  (see also Staver et al. 2011b; Staver and Levin  
119 2012), that takes a high value (combining high fire frequency with its potential effects on forest  
120 trees) at low tree-cover and a low value (representing a background mortality rate in the absence  
121 of fires) at high tree-cover. Finally, we assume that in the absence of fire, the tree cover  
122 accumulates logistically to some carrying capacity, with a per-capita growth rate that we  
123 normalize, without loss of generality, to precipitation  $P$ , reflecting an increase in tree growth  
124 rates [via increased primary productivity (Lieth 1975)] with increasing precipitation.

125           With these simplifying assumptions, the mean-field or the reaction term can be  
126 mathematically expressed as

127 
$$f(T, P) = T \left[ P \left( 1 - \frac{T}{T_k} \right) - \phi(T) \right], \quad (1)$$

128 where  $T$ ,  $T_k$ , and  $P$  represent tree cover, local carrying capacity, and precipitation,  
129 respectively. This reaction term has two important ecological features. First, in the absence of  
130 fire (*i.e.*, at  $\phi = 0$ ), the system equilibrates to a high tree-cover state. This feature of the reaction  
131 term  $f(T, P)$  is consistent with long-term (50-60 years) fire experiments that show that active  
132 fire suppression in mesic savannas can result in a closed canopy forest (Bond et al. 2005; Swaine  
133 et al. 1992; Trapnell 1959). Second, in the presence of fire, the mortality rate of trees has a  
134 threshold response to the tree cover itself (fire-vegetation feedbacks), consistent with previous  
135 empirical work (Archibald et al. 2009), because of which the equilibrium tree cover becomes  
136 bimodal in some intermediate range of rainfall. Theoretically, this implies that inclusion of fire  
137 results in a potential decrease in tree cover below the system's carrying capacity by allowing for  
138 multiple stable states, corresponding to savanna ( $T_S^*$ ) and forest ( $T_F^*$ ), for some parts of parameter  
139 space. This is also evident from the bifurcation diagram in figure 1, which shows that both  
140 savanna and forest are stable states in the intermediate precipitation region, bounded by the two  
141 critical precipitation values ( $P_{SF}$  and  $P_{FS}$ ); meanwhile, outside this rainfall region, the system  
142 has only one stable solution corresponding to savanna and forest in low and high precipitation  
143 regions, respectively. An analogous mean-field system has been thoroughly elaborated in a  
144 number of papers (Staver et al. 2011b; Staver and Levin 2012; Touboul et al. 2018).

145           Next, we incorporate seed dispersal in our model following Skellam (1951). In his paper,  
146 Skellam (1951) assumed that a plant disperses its propagules like a random walk process, with  
147 the probability of finding a propagule highest near the parent stem and falling off with increasing  
148 distance (Levin et al. 2003; Okubo and Levin 2013). This movement of plant populations,  
149 although random at an organism level can be statistically approximated to a continuous Diffusion  
150 (or Laplacian) operator  $\nabla^2$  when scaled to the landscape level (Okubo and Levin 2013; Skellam  
151 1951). Mathematically,  $\nabla^2$  is defined as  $\left[ \frac{\partial^2}{\partial x^2} \right]$  in 1D and  $\left[ \frac{\partial^2}{\partial x^2} + \frac{\partial^2}{\partial y^2} \right]$  in 2D. Here, for  
152 simplicity, we assume that seed dispersal is isotropic, and ignore advective effects, for example  
153 due to wind.

154           Finally, combining the reaction (mean-field) and the diffusion (spatial) components of the

155 model yields a reaction-diffusion equation:

$$156 \quad \frac{\partial T}{\partial t} = f(T, P) + D \nabla^2 T, \quad (2)$$

157 where  $D$  is the diffusion coefficient that captures the rate of seed spread.

158 Although the reaction-diffusion approach to model plant dynamics has proven to be quite  
159 useful because of its analytical tractability and mathematical simplicity, this approach has some  
160 inherent drawbacks, such as approximating discrete variables (such as habitats) as continuous  
161 (Keitt et al. 2001) and failing to consider the effects of long-range seed dispersal (Kot et al.  
162 1996; see Appendix C), both of which have been previously shown to yield qualitatively  
163 different results. Moreover, we also ignore fire spread as spatially explicit process [see Schertzer  
164 et al. (2015) for a more realistic way of modeling fire spread within savannas and (Cochrane  
165 2003; Cochrane et al. 1999) for discussion of the spatial structure of fire spread at the  
166 savanna-forest boundary]; instead, we incorporate fire effects only in the reaction term.  
167 Nevertheless, at continental scales, in the absence of appropriate continuum models, a diffusion  
168 model is a reasonable place to start.

169 In the next section, we explore the behavior of equation (2) using a series of simplifying  
170 assumptions that are ecologically relevant. It may also be worth mentioning that the qualitative  
171 behavior of the equation (2) is independent of the particular details of  $f(T, P)$ . However, in this  
172 paper, we use a particular functional form of  $f(T, P)$  motivated by previous work on the subject  
173 (Staver et al. 2011b; Staver and Levin 2012). We do this to compare and contrast the simulation  
174 results of the previous mean-field model and its spatial counterpart, presented here.

175

## 176 **Methods and Results**

177 Since the mathematical literature on bistable reaction-diffusion models is scattered across  
178 various subfields of physics (Coleman 1977), mathematics (Aronson and Weinberger 1975;  
179 Bramson 1983; Fife and McLeod 1977), and ecology (Lewis and Kareiva 1993; Murray 2001;  
180 Okubo and Levin 2013), we begin by summarizing some of the well-known results of the 1D  
181 diffusion model in the context of savanna and forest biomes. Although some results for the 1D  
182 model have been presented numerically elsewhere (Eby et al. 2017; van de Leemput et al. 2015),  
183 here we provide analytical results that may yield deeper insights. These results will also provide  
184 a baseline for comparison with the 2D diffusion model that has not been discussed in the  
185 literature.

186

## 187 *Reaction-Diffusion Model in One Dimension*

188         Since one of the primary goals of the paper is to determine the spatial limits (boundaries)  
189 of savanna and forest biomes, it is natural to look for solutions that naturally give rise to  
190 boundaries. Based on the extensive literature on invasion biology (Hastings et al. 2005; Keitt et  
191 al. 2001), we know that equation (2) has a traveling wave solution (see Fig. A1), where the  
192 wavefront can be interpreted as the savanna-forest boundary. In this section, we find the velocity  
193 of movement of the savanna-forest boundary as a function of system parameters, e.g.,  
194 precipitation. We then set the velocity to zero to find the equilibrium boundary position.

195         Using the generalized waveform in one-dimension,  $T(x, t) = T(x - vt)$  (Aronson and  
196 Weinberger 1975; Bramson 1983; Fife and McLeod 1977; Murray 2001; Okubo and Levin  
197 2013), where  $v$  is the velocity of the savanna-forest boundary, we find that

$$198 \quad v \propto \sqrt{D} \Delta U(P), \quad (3)$$

199 where  $\Delta U(P)$  is defined as the difference between values of the potential function at forest and  
200 savanna state, respectively (see Appendix B.1 for calculations). Mathematically, the potential  
201 function is defined as  $U(T, P) = -\int_{T_0}^T f(T, P) dT$ , where  $f(T, P)$  is the mean-field growth  
202 function (Nolting and Abbott 2016; Strogatz 2014). This potential function is a formal way of  
203 defining the concept of a potential landscape that is commonly used to understand the resilience  
204 of dynamical systems (Holling 1996; Strogatz 2014). In a bistable system, the potential  
205 landscape consists of two wells corresponding to the two stable states of the system (see top row  
206 in Fig. 1). In the equation above,  $\Delta U(P) [= -\int_{T_S^*}^{T_F^*} f(T, P) dT]$  is the difference between the  
207 depth of potential wells corresponding to savanna and forest.

208         The equation above suggests that the magnitude of  $v$  is proportional to diffusion ( $\sqrt{D}$ )  
209 and the difference in the depth of the potential wells ( $\Delta U$ ), while the direction of  $v$  is purely  
210 determined by the sign of  $\Delta U(P)$ . Thus, in a homogeneous landscape (e.g., with constant  
211 precipitation across the whole landscape), the state with lower potential invades the one with  
212 higher potential, except in the trivial case when the potential for both states is equal (i.e.,  $\Delta U =$   
213  $0$ ; see top row in Fig. 1). The trivial case occurs at a unique precipitation value, which is referred  
214 to as Maxwell precipitation ( $P_M$ ) (Bel et al. 2012; Boettiger and Hastings 2013; Carr et al. 1984;  
215 Clerk-Maxwell 1875; Martín et al. 2015; Pomeau 1986; van de Leemput et al. 2015; Weissmann



216 and Shnerb 2014; Wuyts et al. 2017; Zelnik and Meron 2018). Next, to obtain the velocity of  
217 movement of the savanna-forest boundary as a function of precipitation, we Taylor expand  
218  $\Delta U(P)$  in equation (3) around  $P_M$ :

$$219 \quad v \propto \sqrt{D} (P_M - P). \quad (4)$$

220 This equation implies that in a landscape with precipitation greater than  $P_M$ , forest encroaches  
221 savanna ( $v < 0$ ), and conversely, that in a landscape with precipitation less than  $P_M$ , savanna  
222 encroaches forest ( $v > 0$ ). Only when the landscape receives precipitation exactly equal to  $P_M$   
223 is the savanna-forest boundary neutrally stable (*i.e.*, the magnitude of the small perturbations to  
224 the boundary neither increases or decreases over time). In other words, in a homogeneous  
225 precipitation landscape with  $P \neq P_M$ , a stable savanna-forest boundary is not possible, under  
226 these assumptions (van de Leemput et al. 2015).

227

### 228 *A Precipitation Gradient and Stable Savanna-Forest Boundary*

229 In the previous section, we assumed homogeneous precipitation conditions. However, at  
230 continental scales, landscapes have precipitation gradients. In this section, we show how a  
231 precipitation gradient can lead to a stable savanna-forest boundary (van de Leemput et al. 2015;  
232 Wuyts et al. 2018).

233 To do this, we consider a 1D landscape with a linear precipitation gradient with  
234 precipitation  $P$  at site  $x$  given by

$$235 \quad P(x) = g(x - x_M) + P_M, \quad (5)$$

236 where  $x_M$  is the spatial location receiving  $P_M$  and  $g$  is the change in precipitation per unit  
237 distance (precipitation gradient constant). Substituting equation (5) into equation (4) we get

$$238 \quad \Delta X = \Delta X_o e^{-g\beta\sqrt{D}t}, \quad (6)$$

239 where  $X$  is the position of the savanna-forest boundary,  $\Delta X = X - x_M$  is the deviation of the  
240 boundary from  $x_M$ , and  $\beta$  the natural logarithm of the proportionality constant in equation (4).

241 Equation (6) highlights two important features of the savanna-forest boundary. First, in a  
242 1D landscape with linear precipitation gradient, the boundary equilibrates to  $P_M$  (Fig. 2).  
243 Second, if the boundary is perturbed locally (in any direction), it will recover back to  $x_M$ .  
244 Moreover, the characteristic timescale of recovery is inversely proportional to  $\sqrt{D}$  and  
245 precipitation gradient constant  $g$ . This suggests that the savanna-forest boundary is resilient to  
246 local spatial perturbations (Fig. 2). Although not shown here, our numerical experiments in 1D

247 also suggest that the equilibrium distribution of savanna and forest is independent of initial  
248 conditions (see also van de Leemput et al. 2015; Wuyts et al. 2018).

249 Thus, the 1D diffusion model reproduces what the bistable biome theory (Beckage et al.  
250 2009; Staver et al. 2011b; Staver and Levin 2012) could not: that spatial interactions, overlaid on  
251 a large-scale precipitation gradient, can result in the spatial aggregation of savanna with savanna  
252 and forest with forest, separated by a stable savanna-forest boundary (Fig. 2). Moreover, the  
253 model also predicts that biome shifts are reversible provided the climatic conditions are restored.  
254 Unfortunately, the 1D diffusion model also predicts that the spatial limits of savanna and forest  
255 biomes are solely determined by Maxwell precipitation ( $P_M$ ). In other words, this model fails to  
256 produce overlap in the rainfall ranges of savanna and forest biomes (see also Eby et al. 2017; van  
257 de Leemput et al. 2015; Wuyts et al. 2018), observed in the empirical data (Dantas et al. 2016;  
258 Hirota et al. 2011; Staver et al. 2011a; Staver et al. 2011b).

259

### 260 *Reaction-Diffusion in Two Dimensions*

261 Above, we assumed a one-dimensional landscape. This assumption, however, may not be  
262 realistic for understanding distribution of savanna and forest biomes, since it is somewhat  
263 obvious to observe that their dynamics are better described on a two-dimensional landscape. In  
264 this section, we show that adding a second dimension can qualitatively change the equilibrium  
265 position of the savanna-forest boundary, which can explain the overlap in the rainfall ranges over  
266 which biomes occur.

267 To incorporate the second dimension in the model, we use a 2D polar representation of  
268 the Laplacian operator in equation (2). Following the same analytical approach as in the 1D case,  
269 we show that

$$270 \quad |\Delta P| \propto \sqrt{D} |\kappa_{Mc}|, \quad (7)$$

271 where  $\Delta P$  represents the difference between the precipitation at the savanna-forest boundary  
272 and the Maxwell precipitation contour ( $P_{Mc}$ , notationally distinct from the Maxwell point in 1D  
273  $P_M$ ; see Appendix B.2 for calculations),  $|\kappa_{Mc}|$  the absolute curvature of  $P_{Mc}$  (a measure of  
274 roundness; see Fig. A2), and  $D$  the diffusion constant (as above). This equation describes the  
275 local deviation of the savanna-forest boundary from the location of the  $P_{Mc}$  in terms of the  
276 difference in the precipitation; to obtain the deviation in terms of absolute distance, we multiply  
277  $\Delta P$  by  $g$  (precipitation gradient; see Eq. 5).

278 In plain terms, this means that, in a 2D landscape, the location of the boundary between  
279 savanna and forest is not determined only by precipitation but also crucially depends on the  
280 geometrical shape of the precipitation contours (specifically, of the Maxwell precipitation  
281 contour  $P_{Mc}$ ). When the Maxwell precipitation contour is a straight line (*i.e.*, where  $|\kappa_{Mc}| = 0$ ),  
282 the system behaves like a 1D model, and the savanna-forest boundary coincides with  $P_{Mc}$  (Fig.  
283 3A). However, for an arbitrarily shaped  $P_{Mc}$  ( $|\kappa_{Mc}| \neq 0$ ), the boundary deviates from the  $P_{Mc}$   
284 depending upon the local curvature of  $P_{Mc}$  (Fig. 3B).

285 Ecologically, curvature effects described in equation (7) arise because of source-sink  
286 dynamics (Pulliam 1988; Pulliam 2000) at the savanna-forest boundary. When  $P_{Mc}$  is a straight  
287 line, the inflow and outflow of seeds are balanced, thus resulting in a stable savanna-forest  
288 boundary that coincides exactly with  $P_{Mc}$ . However, if  $P_{Mc}$  is curved, the balance between  
289 inflow and outflow of seeds is disrupted. For example, when the shape of  $P_{Mc}$  is such that there  
290 are more forest neighbors than savanna neighbors surrounding a point in the landscape with  $P =$   
291  $P_{Mc}$  (upper part of Fig. 3B), the inflow of seeds will be higher than their outflow. This creates a  
292 net positive inflow of seeds, resulting in a higher growth rate of trees. Forests expand, pushing  
293 the boundary into savanna region till the added growth rate of trees due to a higher influx of  
294 seeds is compensated by reduced growth rate due to a decrease in precipitation. Conversely,  
295 when a point on  $P_{Mc}$  is surrounded by more savanna patches than forest patches (lower part of  
296 Fig. 3B), there will be a net positive outflow of seeds, which will favor savanna expansion.  
297 Similar to the previous case, the boundary will move into forest regions until the reduced growth  
298 rate of trees due to a lower influx of seeds is balanced by increased growth rate due to an  
299 increase in precipitation.

300 The reaction-diffusion model, presented above, however, has some assumptions that are  
301 likely to be violated in real-world: (1) that dispersal is local (because of diffusion  
302 approximation), (2) that vegetation dynamics have no demographic or external noise, and (3) that  
303 the reaction part has a well defined potential function. As a robustness check, we relax these  
304 assumptions one by one, and numerically test their consequences for the theoretical results  
305 presented above. First, we find that incorporating long-range dispersal (via fat tail dispersal  
306 kernels) does not change equilibrium biome distributions (see Appendix C), presumably because  
307 fire vegetation feedbacks prevent tree establishment far away from the source even when a seed  
308 arrives there (Barton and Turelli 2011; Bates et al. 1997; Kot et al. 1996). Second, we find that

309 adding noise makes the boundary increasingly rough with increasing noise; however, the  
310 location of the boundary at a coarser scale does not move appreciably from its equilibrium  
311 position predicted from the deterministic 2D diffusion model (see Fig. D1). Thirdly, and finally,  
312 we consider a two-dynamical-variable reaction-diffusion system where a potential function  
313 cannot be defined. In such a system, the position of the boundary, in addition to the control  
314 parameter (*e.g.*, precipitation), is dependent on the ratio of the two diffusion constants (Fig. D2);  
315 the system still exhibits curvature effects in equation (7). Therefore, in no case did we find that  
316 violating the above assumptions qualitatively changed dynamics.

317 To summarize, curvature effects in the 2D diffusion model can phenomenologically  
318 reproduce the overlap in the precipitation ranges over which savanna and forest biomes occur,  
319 missing from the 1D diffusion model, while simultaneously retaining the spatial aggregation  
320 property of biomes (Fig. 3D). Moreover, the 2D diffusion model suggests that this precipitation  
321 overlap is not maintained by hysteresis, a defining feature of a bistable biome theory. Instead,  
322 our simulations and analytical calculations suggest that in a landscape with a monotonic  
323 precipitation gradient, hysteresis is unlikely. Below we discuss an ecological scenario under  
324 which hysteresis may reappear.

325

### 326 *Critical Patch Size Effects in a Landscape with Non-Monotonic Precipitation Gradient*

327 In the previous section, we assumed a monotonic gradient in precipitation. However,  
328 precipitation gradients in real-world landscapes are not always monotonic. As such, a landscape  
329 can have a complex distribution of precipitation with high precipitation regions intermittently  
330 distributed in low precipitation regions, and vice versa. In the following section, we describe  
331 how this feature of precipitation gradients can potentially lead to hysteresis.

332 But before we do that, we first consider a simpler case of a homogeneous precipitation model for  
333 analytical insight. Based on the theoretical works of Bradford and Philip (1970a,b), it can be  
334 shown that in a homogeneous precipitation landscape with bistable dynamics, the fate of an  
335 invasion process by a particular vegetation state into another is dependent on two factors:  
336 precipitation  $P$  and the initial patch area of the invading state  $A$ . An invading patch of  
337 vegetation smaller than a critical patch area ( $A < A_c$ ) will not be able to expand even though that  
338 vegetation state is climatically favourable, *i.e.*, the state which has lower potential (Bradford and  
339 Philip 1970a; Bradford and Philip 1970b; Holmes et al. 1994; Oxtoby 1998; Skellam 1951). Our

340 calculations suggest that near  $P_M$ , the critical patch size in a homogeneous landscape can be  
341 approximated as

$$342 \quad A_c \propto \frac{D}{(\Delta P_H)^2}, \quad (8)$$

343 where  $\Delta P_H$  is the difference between the precipitation of the homogeneous landscape and  $P_M$ .  
344 To fully understand the implications of equation (8), consider an initial savanna landscape with  
345 precipitation just above  $P_M$ . Although in this landscape forest is more favourable than savanna  
346 because of lower potential (Eq. 3), the forest state will only be able to invade if there is an initial  
347 patch of forest that has an area greater than  $A_c$  (Eq. 8). This is because a small patch of forest  
348 has a high perimeter-to-area ratio (Skellam 1951), such that the accumulation of trees is slow  
349 because seed inflow per unit area from forest patches is low, preventing forest expansion. By the  
350 same token, a landscape in a forest state with precipitation just below  $P_M$  would require a large  
351 patch of savanna to overcome high levels of seed rain from neighboring forest patches.

352 The same phenomenon also applies to a landscape with precipitation gradients. Consider  
353 an initial savanna landscape with spatially varying precipitation patterns such that the whole  
354 landscape has rainfall less than  $P_M$ , except in the center where the rainfall is just above  $P_M$ .  
355 Since the whole landscape was initialized with savanna, the center of the landscape will remain  
356 in a savanna state, unless the central region is initialized with forest patch of area greater than  
357  $A_c$ . Conversely, a similar argument holds for an all forest landscape with a low-rainfall island in  
358 the center.

359 This suggests that the vegetation state of small and isolated patches in intermediate  
360 rainfall regions depends on the availability of a nucleation center, suggesting that the  
361 characteristic biome state in those areas might be contingent on historical biome patterns, thus  
362 exhibiting hysteresis. And more importantly, this analysis suggests that critical patch size (Eq.  
363 8), in addition to curvature effects (Eq. 7), can also explain overlap in the rainfall ranges of  
364 savanna and forest biomes.

365

### 366 *Curvature and Critical Patch Size Effects in Empirical Systems*

367 In this section, we test some of the key analytical predictions of our 2D reaction-diffusion  
368 model—particularly those concerning curvature (Eq. 7) and critical patch size effects (Eq.  
369 8)—using real savanna and forest distributions in Sub-Saharan Africa. As described above, a 2D  
370 reaction-diffusion approximation of savanna-forest dynamics predicts that the location of the

371 savanna-forest boundary with respect to precipitation should vary depending upon the local  
372 curvature of the boundary (Eq. 7; Fig. 3B) in such a way that the difference between the  
373 precipitation at the boundary and  $P_{Mc}$  is linearly proportional to the local curvature of the  
374 boundary. As such, plotting the absolute curvature of the boundary (ignoring its convexity) as a  
375 function of boundary precipitation should yield a V-shaped curve, the vertex of which should  
376 correspond to  $P_M$ . Indeed, using African tree cover and mean annual precipitation (MAP) data  
377 (see Data Analysis in Online Appendix D), we show that the current distribution of savanna and  
378 forest in Africa is consistent with this prediction (black line in Fig. 4). The location of the vertex  
379 of that curve provides an estimate of  $P_M = 1508 \pm 84$  mm MAP, consistent with previous  
380 empirical work (Staal et al. 2016 found  $P_M = 1580$  mm MAP). The confidence interval for this  
381 estimate was determined by calculating  $P_M$  for various combination of parameter values of (i)  
382 boundary tree cover (73-80%) used for identifying boundary location, and (ii) arc length of the  
383 boundary (100-1000 km) used to estimate curvature. For more details on estimating  $P_M$ , see  
384 figure D3 and sensitivity analysis in Online Appendix D.

385 Next, we compare the above estimate of  $P_M$ , by estimating  $P_M$  with an alternative  
386 method. This involves simulating the potential distribution of savanna and forest using a 2D  
387 reaction-diffusion model with current biome distributions as the initial condition. To do this, we  
388 simulated spatial distributions of savanna and forest using present-day precipitation patterns for  
389 various combinations of  $P_M$  and  $D$  (see Data Analysis in Online Appendix D), and, using a  
390 genetic algorithm (Scrucca 2013), selected those parameter values ( $P_M$  and  $D$ ) that yielded the  
391 ‘best fit’ to the current distribution of biomes. Here, we refer to ‘best fit’ as maximizing pixel by  
392 pixel match between simulated and empirical savanna and forest distribution (see Data Analysis  
393 in Online Appendix D). This procedure yielded an estimate of  $P_M$  (= 1538 mm MAP) that lay  
394 within the expected precipitation range obtained from the curvature analysis in figure 4 (see Fig.  
395 D4). These large-scale simulations also reproduced empirically observed biome distributions in  
396 Sub-Saharan Africa surprisingly well for such a simple model (Fig. 5A), except for small regions  
397 in the Bateke Plateau in Congo and Western Africa. In the Bateke Plateau, empirically observed  
398 savannas may be maintained because shallow sandy soils that reduce effective soil moisture  
399 (White 1986) or may alternatively be anthropogenic. Meanwhile, it is well established that  
400 savannas in Western Africa are a result of historical deforestation (Adams and Faure 1997;  
401 Aleman et al. 2017).



402           Next, to check whether the results of large-scale simulation in figure 5A were dependent  
403 on the initial conditions – at least theoretically possible because of critical patch size effects, as  
404 described above – we simulated the vegetation distribution for two more initial conditions: ‘all  
405 savanna’ and ‘all forest’ in Sub-Saharan Africa (Fig. 5B-C), using the best fit parameter values  
406 estimated above ( $P_M$  and  $D$ ). Simulations with ‘all savanna’ initial conditions (Fig. 5B) matched  
407 those using current distributions as initial conditions (see Fig. 5A). However, ‘all forest’ initial  
408 conditions produce substantially different biome patterns in the Southern Congo and Ethiopian  
409 Highlands (Fig. 5C).

410           We propose that the critical patch area ( $A_c$ ) requirement can potentially explain why the  
411 simulations over-predict the forest extent in the Southern Congo (Fig. 5C) and under-predict the  
412 forest extent in Ethiopian Highlands (Fig. 5B). Since both of these regions are disconnected from  
413 the main forest cluster by savanna vegetation, biome distributions in these regions are dependent  
414 on the availability of historical nucleation centers (or initial conditions; Eq. 8). Based on our  
415 simulations we suspect that Southern Congo and Ethiopian Highlands were historically occupied  
416 by savannas and forests, respectively, which resulted in their present distribution. Although this  
417 claim is currently hard to test due to lack of reliable long-term paleo-records from these regions  
418 (however, see Elenga et al. 1994; Jolly et al. 1998), historical vegetation reconstructions for the  
419 early 20<sup>th</sup> century (Aleman et al. 2017; White 1986) are consistent with the theoretical  
420 predictions of the model.

421

#### 422 *Comparisons with Alternative Models*

423           Our calculations show that novel dynamical features of the 2D diffusion model — such  
424 as spatial aggregation (Eq. 6), curvature effects (Eq. 7), and critical patch size (Eq. 8) — can  
425 qualitatively explain many empirical features of savanna and forest distributions that previous  
426 biome distribution models could not. In this section, we investigate whether these dynamical  
427 features improve upon the predictions from previously proposed models of biome distribution.  
428 To do this, we simulate the distribution of savanna and forest in Sub-Saharan Africa using three  
429 alternatives (see Data Analysis in Online Appendix D). First, (a) we consider a ‘one-climate  
430 one-biome’ model in which the savanna-forest boundary is determined by a unique precipitation  
431 contour. This model is analogous to the classical biome theory (Fig. 6A). Next, (b) we consider a  
432 model in which the local vegetation dynamics in each patch are governed by mean-field bistable

433 model and the neighbouring patches do not interact. In this model, we randomly initialize the  
434 landscape with savanna and forest patches (Fig. 6B); note, however, that this test does not  
435 consider the possibility that initial conditions could be spatially structured, leading to spatial  
436 structure in biome distributions today. Finally, (c) we consider a 2D reaction-diffusion model,  
437 already described at length above (Fig. 6C). The diffusion model incorporates both bistability  
438 vegetation dynamics and dispersal.

439 We measure whether these models can – with parameter optimization – reproduce three  
440 components of biome distribution: overlap in the rainfall ranges of biomes, the spatial  
441 aggregation of savanna with savanna and forest with forest, and the match between the simulated  
442 and actual distribution of biomes (see Fig. 6, Fig. D5, and Table 1). Note, again, that tuned  
443 parameters do not necessarily correspond to demographic rates, etc., that might be measured  
444 empirically; note also that the three model alternatives we propose here are not exhaustive.

445 In the ‘one-climate one-biome’ model, the precipitation cutoff between savanna and  
446 forest was found to be 1583 mm MAP (see Table 1). Whereas, in the other two models the  
447 rainfall ranges of savanna and forest showed considerable overlap between 1000 mm and 2000  
448 mm. Meanwhile, the one-climate one-biome and 2D diffusion models show a high probability of  
449 spatial aggregation (above 90%) that is missing in the mean-field bistable model (below 68%).  
450 Thus, of the three models, only the 2D diffusion model can reproduce both spatial aggregation  
451 and overlap in the rainfall ranges of biomes. Therefore, it is not surprising that the 2D diffusion  
452 model also outperforms (97% accuracy) other models in terms of predicting the spatial  
453 distribution of biomes in Sub-Saharan Africa.

454 In summary, all models, except in a one-climate one-biome model, reproduce at least  
455 some overlap in the rainfall ranges of biomes (Table 1 and Fig. D5). Of the two remaining  
456 models, the mean-field bistable model fails to reproduce the spatial aggregation of biomes (Fig. 6  
457 and Table 1). This leaves us with the 2D reaction-diffusion model, which reproduces not only the  
458 climatic overlap in the limits of biomes, and the spatial aggregation in biome distributions, but  
459 also the overall biome distributions in Sub-Saharan Africa with remarkable accuracy (see Table  
460 1).

461

## 462 **Discussion**

463 In this paper, we develop and analyze a reaction-diffusion model to examine the contributions



464 of dispersal to the distribution and resilience of tropical savanna and forest biomes. The model  
465 assumes that the local mean-field dynamics of biomes are governed by non-linear fire-vegetation  
466 feedbacks and that adjacent savanna and forest patches interact spatially through seed dispersal.

467 We find that the model reproduces empirical features missing from existing biome  
468 distribution models. Specifically, the 2D reaction-diffusion model simultaneously reproduces  
469 both overlap in the climatic ranges of biomes, as well as spatial aggregation of savanna with  
470 savanna and forest with forest. As before, we find that fire-vegetation feedbacks may  
471 substantially expand savanna distributions at the expense of forests, but that in a spatial context  
472 this does not necessarily translate into bistable vegetation distributions. Instead, the equilibrium  
473 position of the savanna-forest boundary is determined by a combination of three factors: (a)  
474 climate (via impacts on the relative depth of potential wells for each biome), (b) source-sink  
475 dynamics (via local curvature of the Maxwell precipitation contour), and, occasionally, by (c)  
476 availability of historical nucleation centers (which contributes an element of hysteresis to  
477 distribution dynamics, albeit more limited than that described before). These theoretical  
478 predictions are empirically consistent with observations of the curvature of the savanna-forest  
479 boundary, and large-scale simulations which show that the 2D diffusion model can — with  
480 parameter optimization—reproduce empirically observed patterns of savanna and forest  
481 distributions in Sub-Saharan Africa.

482 These findings have direct implications for how we think of the stability and resilience of  
483 tropical biomes. Classical biome theories suggest that perturbations to biome distributions should  
484 be easily reversible since vegetation tracks climate directly (Holdridge 1947; Schimper 1902;  
485 von Humboldt and Bonpland 1807; Whittaker 1970). By contrast, more recent work has  
486 suggested that fire-vegetation feedbacks can stabilize savanna as an alternative to forest in some  
487 areas, such that perturbations to biome distributions may not be easily reversible (Beckage et al.  
488 2009; Staver et al. 2011b; Staver and Levin 2012). Here, we show that combining a spatial  
489 dispersal process with an underlying bistable model radically alters stability predictions: biome  
490 recovery after perturbation becomes much more likely, even if fire-vegetation feedbacks do  
491 modify vegetation (which they probably do; see Bond et al. 2005). In this scenario, biome  
492 transitions may be regionally predictable and reversible, even if they are locally abrupt.

493 However, there is a notable caveat to this prediction. In isolated rainfall islands,  
494 vegetation distributions may exhibit hysteresis; analogously, if remnant vegetation patches are

495 reduced below a critical area, recovery of the boundary may be impossible, resulting in a  
496 permanent loss of vegetation. As a result, extensive historical forest loss, *e.g.*, in West Africa,  
497 coastal Kenya and Tanzania, and the Ethiopian highlands, may be irrecoverable without direct  
498 intervention, since remnant forest patches may be too small for forest to recolonize successfully  
499 (Aleman and Staver 2018). This also raises contrasting concerns about proposed afforestation  
500 plans in mesic savannas of the Southern Congo (Veldman et al. 2015). These isolated mesic  
501 savannas might be historically maintained as a stable alternative biome state (Aleman et al.  
502 2017); proposed afforestation practices (Veldman et al. 2015) in these regions could trigger a  
503 permanent shift in ecosystem state from savanna to forest (Fig. 5C), which may lead to loss of  
504 endemic biodiversity in mesic savannas (Bond 2016) and wastage of scarce management  
505 resources.

506 The results of the reaction-diffusion model presented herein should be interpreted with  
507 caution, however. For starters, we here incorporate only a subset of important spatial processes,  
508 notably ignoring the long-range spread of fire within savannas (Schertzer et al. 2015) and local  
509 fire spread at the savanna-forest boundary (Cochrane 2003; Cochrane et al. 1999) both of which  
510 may be significant (note, however, that we have included fire effects in the reaction term of the  
511 model). However, ongoing analytical work on a more thorough set of models that examine fire  
512 effects at the boundary between savanna and forest (Durrett and Ma 2018) suggest that the  
513 phenomenological results presented herein may be applicable more broadly: scaling limits to  
514 those models appear also to be characterized by traveling waves, with the occurrence of  
515 stationary savanna-forest boundaries only in landscapes that include a gradient in rainfall  
516 (Durrett and Ma 2018). Notably, however, long-range fire effects seem to change predictions  
517 somewhat (Li et al., in review), resulting in the emergence of stable savanna-forest mosaics even  
518 under homogenous climatic conditions (Schertzer et al. 2015).

519 Another major question surrounds the problem of time-scales of ecological processes.  
520 Here, we have considered only the equilibrium distribution of biomes, ignoring the speed of  
521 equilibration. Modern climate change is sufficiently rapid (Karl and Trenberth 2003), and so  
522 associated with extreme climatic events (Jentsch et al. 2007; Katz and Brown 1992), that biome  
523 responses to ongoing anthropogenic global change are unlikely to be dominated by these local  
524 spatial processes. This may result in transient mismatches between climate and equilibrium  
525 vegetation (Webb 1986), which may be persistent from timescales ranging from decades to

526 millennia depending on the speed of ecological dynamics (Hastings 2004; Hastings et al. 2018;  
527 Hastings and Higgins 1994). Therefore, understanding how fast biomes respond to changing  
528 climate (empirically from the paleo-records) and using this information to incorporate dispersal  
529 into existing non-spatial biosphere models (Bond and Keeley 2005; Bond et al. 2003; Moncrieff  
530 et al. 2014; Scheiter and Higgins 2009; Scheiter et al. 2013) will be critical to generating  
531 informative predictions for the effects of anthropogenic global change on biome distributions.

532 Projections show that rapidly changing climate (Lewis et al. 2011; Nepstad et al. 2004)  
533 and land-use change (Aleman et al. 2016; Cochrane and Laurance 2002) are expected to result in  
534 large-scale biome shifts, which may yield huge economic and ecological losses. Here, we argue  
535 that, except in a few cases, dispersal can, in general, increase the resilience of tropical savanna  
536 and forest biomes to natural and anthropogenic disturbances (see also van de Leemput et al.  
537 2015). However, recovery from disturbance could be slow, due to slow dynamics of biomes and  
538 anthropogenic or natural dispersal barriers.

539

#### 540 **Author Contributions**

541 NG and ACS designed this model based on a concept from ACS. NG and VG implemented the  
542 diffusion and integro-differential equation models. NG performed simulations and data analyses.  
543 ACS and NG co-wrote the manuscript with feedback from VG and SAL. All the authors  
544 contributed ideas and discussions.

545

#### 546 **Acknowledgments**

547 Funding for this work was provided by a grant from the NSF to ACS (#DMS-1615531) and SAL  
548 (#DMS 1615585) and by Yale University. VG is supported by DBT-IISc partnership program.  
549 We thank Thierry Emonet for help with technical problems simulating the integro-differential  
550 equation model. We also thank members of the Staver lab, especially Julie Aleman and Madelon  
551 Case, for manuscript feedback.

552 **References**

- 553 Adams, J. M., and H. Faure. 1997. QEN members. Review and Atlas of Paleovegetation:  
554 Preliminary land ecosystem maps of the world since the Last Glacial Maximum.  
555 <http://www.esd.ornl.gov/projects/qen/adams1.html>. Oak Ridge National Laboratory,  
556 TN, USA.
- 557 Aleman, J. C., O. Blarquez, and C. A. Staver. 2016. Land-use change outweighs projected effects  
558 of changing rainfall on tree cover in sub-Saharan Africa. *Global change biology*  
559 22:3013--3025.
- 560 Aleman, J. C., M. A. Jarzyna, and A. C. Staver. 2017. Forest extent and deforestation in tropical  
561 Africa since 1900. *Nature ecology & evolution*:1.
- 562 Aleman, J. C., and C. A. Staver. 2018. Spatial patterns in the global distributions of savanna and  
563 forest. *Global Ecology and Biogeography* 0.
- 564 Allen, S. M., and J. W. Cahn. 1979. A microscopic theory for antiphase boundary motion and its  
565 application to antiphase domain coarsening. *Acta Metallurgica* 27:1085--1095.
- 566 Archibald, S., D. P. Roy, V. Wilgen, W. Brian, and R. J. Scholes. 2009. What limits fire? An  
567 examination of drivers of burnt area in Southern Africa. *Global Change Biology*  
568 15:613--630.
- 569 Aronson, D. G., and H. F. Weinberger. 1975. Nonlinear diffusion in population genetics,  
570 combustion, and nerve pulse propagation, Pages 5–49 *Partial differential equations and*  
571 *related topics*, Springer.
- 572 Barton, N., and M. Turelli. 2011. Spatial waves of advance with bistable dynamics: cytoplasmic  
573 and genetic analogues of Allee effects. *The American Naturalist* 178:E48—E75.
- 574 Bates, P. W., P. C. Fife, X. Ren, and X. Wang. 1997. Traveling waves in a convolution model for  
575 phase transitions. *Archive for Rational Mechanics and Analysis* 138:105--136.
- 576 Beckage, B., W. J. Platt, and L. J. Gross. 2009. Vegetation, fire, and feedbacks: a  
577 disturbance-mediated model of savannas. *The American Naturalist* 174:805--818.
- 578 Bel, G., A. Hagberg, and E. Meron. 2012. Gradual regime shifts in spatially extended  
579 ecosystems. *Theoretical Ecology* 5:591--604.
- 580 Boettiger, C., and A. Hastings. 2013. Tipping points: From patterns to predictions. *Nature*  
581 493:157.
- 582 Bond, W. J. 2016. Ancient grasslands at risk. *Science* 351:120--122.

- 583 Bond, W. J., and J. E. Keeley. 2005. Fire as a global ‘herbivore’: the ecology and evolution of  
584 flammable ecosystems. *Trends in ecology & evolution* 20:387--394.
- 585 Bond, W. J., G. F. Midgley, F. I. Woodward, M. T. Hoffman, and R. M. Cowling. 2003. What  
586 controls South African vegetation? climate or fire? *South African Journal of Botany*  
587 69:79--91.
- 588 Bond, W. J., F. I. Woodward, and G. F. Midgley. 2005. The global distribution of ecosystems in  
589 a world without fire. *New phytologist* 165:525--538.
- 590 Bradford, E., and J. R. Philip. 1970a. Note on asocial populations dispersing in two dimensions.  
591 *Journal of theoretical biology* 29:27--33.
- 592 —. 1970b. Stability of steady distributions of asocial populations dispersing in one dimension.  
593 *Journal of theoretical biology* 29:13--26.
- 594 Bramson, M. 1983, Convergence of solutions of the Kolmogorov equation to travelling waves, v.  
595 285, American Mathematical Soc.
- 596 Carr, J., M. E. Gurtin, and M. Slemrod. 1984. Structured phase transitions on a finite interval.  
597 *Archive for rational mechanics and analysis* 86:317--351.
- 598 Chen, X. 1992. Generation and propagation of interfaces for reaction-diffusion equations.  
599 *Journal of Differential equations* 96:116--141.
- 600 Clerk-Maxwell, J. 1875. On the dynamical evidence of the molecular constitution of bodies,  
601 Nature Publishing Group.
- 602 Clobert, J. 2012, Dispersal ecology and evolution, Oxford University Press.
- 603 Cochrane, M. A. 2003. Fire science for rainforests. *Nature* 421:913.
- 604 Cochrane, M. A., A. Alencar, M. D. Schulze, C. M. Souza, D. C. Nepstad, P. Lefebvre, and E. A.  
605 Davidson. 1999. Positive feedbacks in the fire dynamic of closed canopy tropical forests.  
606 *Science* 284:1832—1835.
- 607 Cochrane, M. A., and W. F. Laurance. 2002. Fire as a large-scale edge effect in Amazonian  
608 forests. *Journal of Tropical Ecology* 18:311--325.
- 609 Coleman, S. 1977. Fate of the false vacuum: Semiclassical theory. *Physical Review D* 15:2929.
- 610 Daily, G. 1997, Nature's services: societal dependence on natural ecosystems, Island Press.
- 611 Dantas, V. d. L., M. Hirota, R. S. Oliveira, and J. G. Pausas. 2016. Disturbance maintains  
612 alternative biome states. *Ecology letters* 19:12--19.
- 613 Durrett, R., and R. Ma. 2018. A heterogeneous spatial model in which savanna and forest coexist

- 614 in a stable equilibrium. arXiv preprint arXiv:1808.08159.
- 615 Eby, S., A. Agrawal, S. Majumder, A. P. Dobson, and V. Guttal. 2017. Alternative stable states  
616 and spatial indicators of critical slowing down along a spatial gradient in a savanna  
617 ecosystem. *Global Ecology and Biogeography*.
- 618 Elenga, H., D. Schwartz, and A. Vincens. 1994. Pollen evidence of late Quaternary vegetation  
619 and inferred climate changes in Congo. *Palaeogeography, Palaeoclimatology,*  
620 *Palaeoecology* 109:345—356.
- 621 Evans, L. C., H. M. Soner, and P. E. Souganidis. 1992. Phase transitions and generalized motion  
622 by mean curvature. *Communications on Pure and Applied Mathematics* 45:1097--1123.
- 623 Favier, C., J. Chave, A. Fabing, D. Schwartz, and M. A. Dubois. 2004. Modelling  
624 forest--savanna mosaic dynamics in man-influenced environments: effects of fire, climate  
625 and soil heterogeneity. *Ecological Modelling* 171:85--102.
- 626 Fife, P. C., and J. B. McLeod. 1977. The approach of solutions of nonlinear diffusion equations  
627 to travelling front solutions. *Archive for Rational Mechanics and Analysis* 65:335--361.
- 628 Gandhi, A., S. Levin, and S. Orszag. 1999. Nucleation and relaxation from meta-stability in  
629 spatial ecological models. *Journal of theoretical biology* 200:121--146.
- 630 Guttal, V., and C. Jayaprakash. 2007. Self-organization and productivity in semi-arid  
631 ecosystems: implications of seasonality in rainfall. *Journal of theoretical biology*  
632 248:490--500.
- 633 —. 2008. Changing skewness: an early warning signal of regime shifts in ecosystems. *Ecology*  
634 *letters* 11:450--460.
- 635 —. 2009. Spatial variance and spatial skewness: leading indicators of regime shifts in spatial  
636 ecological systems. *Theoretical Ecology* 2:3--12.
- 637 Hansen, M. C., P. V. Potapov, R. Moore, M. Hancher, S. A. Turubanova, A. Tyukavina, D. Thau  
638 et al. 2013. High-resolution global maps of 21st-century forest cover change. *science*  
639 342:850--853.
- 640 Hastings, A. 2004. Transients: the key to long-term ecological understanding? *Trends in Ecology*  
641 *& Evolution* 19:39--45.
- 642 Hastings, A., K. C. Abbott, K. Cuddington, T. Francis, G. Gellner, Y.-C. Lai, A. Morozov et al.  
643 2018. Transient phenomena in ecology. *Science* 361:eaat6412.
- 644 Hastings, A., K. Cuddington, K. F. Davies, C. J. Dugaw, S. Elmendorf, A. Freestone, S. Harrison

- 645 et al. 2005. The spatial spread of invasions: new developments in theory and evidence.  
646 Ecology Letters 8:91--101.
- 647 Hastings, A., and K. Higgins. 1994. Persistence of transients in spatially structured ecological  
648 models. Science 263:1133--1137.
- 649 Hennenberg, K. J., F. Fischer, K. Kouadio, D. Goetze, B. Orthmann, K. E. Linsenmair, F. Jeltsch  
650 et al. 2006. Phytomass and fire occurrence along forest--savanna transects in the  
651 Como National Park, Ivory Coast. Journal of Tropical Ecology 22:303--311.
- 652 Higgins, S. I., W. J. Bond, and W. S. W. Trollope. 2000. Fire, resprouting and variability: a  
653 recipe for grass--tree coexistence in savanna. Journal of Ecology 88:213--229.
- 654 Hirota, M., M. Holmgren, E. H. Van Nes, and M. Scheffer. 2011. Global resilience of tropical  
655 forest and savanna to critical transitions. Science 334:232--235.
- 656 Holdridge, L. R. 1947. Determination of world plant formations from simple climatic data.  
657 Science 105:367--368.
- 658 Holl, K. D., M. E. Loik, E. H. V. Lin, and I. A. Samuels. 2000. Tropical montane forest  
659 restoration in Costa Rica: overcoming barriers to dispersal and establishment. Restoration  
660 ecology 8:339--349.
- 661 Holling, C. S. 1996. Engineering resilience versus ecological resilience. Engineering within  
662 ecological constraints 31:32.
- 663 Holmes, E. E., M. A. Lewis, J. E. Banks, and R. R. Veit. 1994. Partial differential equations in  
664 ecology: spatial interactions and population dynamics. Ecology 75:17--29.
- 665 Huffman, G. J., and D. T. Bolvin. 2013. TRMM and other data precipitation data set  
666 documentation. NASA, Greenbelt, USA 28.
- 667 Jentsch, A., J. Kreyling, and C. Beierkuhnlein. 2007. A new generation of climate-change  
668 experiments: events, not trends. Frontiers in Ecology and the Environment 5:365--374.
- 669 Jolly, D., I. C. Prentice, R. Bonnefille, A. Ballouche, M. Bengo, P. Brenac, G. Buchet et al. 1998.  
670 Biome reconstruction from pollen and plant macrofossil data for Africa and the Arabian  
671 peninsula at 0 and 6000 years. Journal of Biogeography 25:1007--1027.
- 672 Karl, T. R., and K. E. Trenberth. 2003. Modern global climate change. science 302:1719--1723.
- 673 Katz, R. W., and B. G. Brown. 1992. Extreme events in a changing climate: variability is more  
674 important than averages. Climatic change 21:289--302.
- 675 Keener, J. P. 1986. A geometrical theory for spiral waves in excitable media. SIAM Journal on



- 676 Applied Mathematics 46:1039--1056.
- 677 Keitt, T. H., M. A. Lewis, and R. D. Holt. 2001. Allee effects, invasion pinning, and species?  
678 borders. *The American Naturalist* 157:203--216.
- 679 Kot, M., M. A. Lewis, and P. van den Driessche. 1996. Dispersal data and the spread of invading  
680 organisms. *Ecology* 77:2027--2042.
- 681 Levin, S. A. 1992. The problem of pattern and scale in ecology: the Robert H. MacArthur award  
682 lecture. *Ecology* 73:1943--1967.
- 683 Levin, S. A., H. C. Muller-Landau, R. Nathan, and J. Chave. 2003. The ecology and evolution of  
684 seed dispersal: a theoretical perspective. *Annual Review of Ecology, Evolution, and*  
685 *Systematics* 34:575--604.
- 686 Lewis, M., and P. Kareiva. 1993. Allee dynamics and the spread of invading organisms.  
687 *Theoretical Population Biology* 43:141--158.
- 688 Lewis, S. L., P. M. Brando, O. L. Phillips, G. M. F. van der Heijden, and D. Nepstad. 2011. The  
689 2010 amazon drought. *Science* 331:554--554.
- 690 Lieth, H. 1975. Modeling the primary productivity of the world, Pages 237—263 *Primary*  
691 *productivity of the biosphere*, Springer.
- 692 Loarie, S. R., P. B. Duffy, H. Hamilton, G. P. Asner, C. B. Field, and D. D. Ackerly. 2009. The  
693 velocity of climate change. *Nature* 462:1052.
- 694 Ludwig, D., D. D. Jones, and C. S. Holling. 1978. Qualitative analysis of insect outbreak  
695 systems: the spruce budworm and forest. *The Journal of Animal Ecology*:315--332.
- 696 Malchow, H., W. Ebeling, R. Feistel, and L. Schimansky-Geier. 1983. Stochastic Bifurcations in  
697 a Bistable Reaction-Diffusion System with Neumann Boundary Conditions. *Annalen der*  
698 *Physik* 495:151--160.
- 699 Malcolm, J. R., A. Markham, R. P. Neilson, and M. Garaci. 2002. Estimated migration rates  
700 under scenarios of global climate change. *Journal of Biogeography* 29:835--849.
- 701 Martín, P. V., J. A. Bonachela, S. A. Levin, and M. A. Muñoz. 2015. Eluding catastrophic shifts.  
702 *Proceedings of the National Academy of Sciences* 112:E1828--E1836.
- 703 May, R. M. 1977. Thresholds and breakpoints in ecosystems with a multiplicity of stable states.  
704 *Nature* 269:471--477.
- 705 Medlock, J., and M. Kot. 2003. Spreading disease: integro-differential equations old and new.  
706 *Mathematical Biosciences* 184:201--222.



- 707 Merriman, B., J. K. Bence, and S. Osher. 1992, Diffusion generated motion by mean curvature,  
708 Department of Mathematics, University of California, Los Angeles.
- 709 Moncrieff, G. R., S. Scheiter, W. J. Bond, and S. I. Higgins. 2014. Increasing atmospheric CO<sub>2</sub>  
710 overrides the historical legacy of multiple stable biome states in Africa. *New Phytologist*  
711 201:908--915.
- 712 Murray, J. D. 2001, *Mathematical Biology. II Spatial Models and Biomedical Applications*  
713 *{Interdisciplinary Applied Mathematics V. 18}*, Springer-Verlag New York  
714 Incorporated.
- 715 Nepstad, D., P. Lefebvre, U. Lopes da Silva, J. Tomasella, P. Schlesinger, L. Solorzano, P.  
716 Moutinho et al. 2004. Amazon drought and its implications for forest flammability and  
717 tree growth: A basin-wide analysis. *Global Change Biology* 10:704--717.
- 718 Nolting, B. C., and K. C. Abbott. 2016. Balls, cups, and quasi-potentials: quantifying stability in  
719 stochastic systems. *Ecology* 97:850--864.
- 720 Noy-Meir, I. 1975. Stability of grazing systems: an application of predator-prey graphs. *The*  
721 *Journal of Ecology*:459--481.
- 722 Okubo, A., and S. A. Levin. 2013, *Diffusion and ecological problems: modern perspectives*, v.  
723 14, Springer Science & Business Media.
- 724 Oxtoby, D. W. 1998. Nucleation of first-order phase transitions. *Accounts of chemical research*  
725 31:91--97.
- 726 Pomeau, Y. 1986. Front motion, metastability and subcritical bifurcations in hydrodynamics.  
727 *Physica D: Nonlinear Phenomena* 23:3--11.
- 728 Prior, L. D., R. J. Williams, and D. M. Bowman. 2010. Experimental evidence that fire causes a  
729 tree recruitment bottleneck in an Australian tropical savanna. *Journal of Tropical Ecology*  
730 26:595—603.
- 731 Pueyo, S., P. M. i. c. L. De Alencastro Gra $\{c\}$ a, R. I. Barbosa, R. Cots, E. Cardona, and P.  
732 M. Fearnside. 2010. Testing for criticality in ecosystem dynamics: the case of Amazonian  
733 rainforest and savanna fire. *Ecology letters* 13:793—802.
- 734 Pulliam, H. R. 1988. Sources, sinks, and population regulation. *The American Naturalist*  
735 132:652--661.
- 736 —. 2000. On the relationship between niche and distribution. *Ecology letters* 3:349--361.
- 737 Puyravaud, J.-P., J.-P. Pascal, and C. Dufour. 1994. Ecotone structure as an indicator of changing

- 738 forest-savanna boundaries (Linganamakki region, southern India). *Journal of*  
739 *Biogeography*:581--593.
- 740 Salazar, L. F., C. A. Nobre, and M. D. Oyama. 2007. Climate change consequences on the biome  
741 distribution in tropical South America. *Geophysical Research Letters* 34.
- 742 Scheffer, M. 2004, *Ecology of shallow lakes*, Springer Science & Business Media.
- 743 Scheiter, S., and S. I. Higgins. 2009. Impacts of climate change on the vegetation of Africa: an  
744 adaptive dynamic vegetation modelling approach. *Global Change Biology*  
745 15:2224--2246.
- 746 Scheiter, S., L. Langan, and S. I. Higgins. 2013. Next-generation dynamic global vegetation  
747 models: learning from community ecology. *New Phytologist* 198:957--969.
- 748 Schertzer, E., A. C. Staver, and S. A. Levin. 2015. Implications of the spatial dynamics of fire  
749 spread for the bistability of savanna and forest. *Journal of mathematical biology*  
750 70:329--341.
- 751 Schimper, A. F. W. 1902, *Plant-geography upon a physiological basis*, Clarendon Press.
- 752 Schlögl, F. 1972. Chemical reaction models for non-equilibrium phase transitions. *Zeitschrift für*  
753 *Physik A Hadrons and Nuclei* 253:147--161.
- 754 Scrucca, L. 2013. GA: a package for genetic algorithms in R. *Journal of Statistical Software*  
755 53:1--37.
- 756 Skellam, J. G. 1951. Random dispersal in theoretical populations. *Biometrika* 38:196--218.
- 757 Staal, A., S. C. Dekker, C. Xu, and E. H. van Nes. 2016. Bistability, Spatial Interaction, and the  
758 Distribution of Tropical Forests and Savannas. *Ecosystems* 19:1080--1091.
- 759 Staver, A. C., S. Archibald, and S. A. Levin. 2011a. The global extent and determinants of  
760 savanna and forest as alternative biome states. *Science* 334:230--232.
- 761 —. 2011b. Tree cover in sub-Saharan Africa: Rainfall and fire constrain forest and savanna as  
762 alternative stable states. *Ecology* 92:1063--1072.
- 763 Staver, A. C., W. J. Bond, W. D. Stock, S. J. Van Rensburg, and M. S. Waldram. 2009.  
764 Browsing and fire interact to suppress tree density in an African savanna. *Ecological*  
765 *Applications* 19:1909--1919.
- 766 Staver, A. C., and S. A. Levin. 2012. Integrating theoretical climate and fire effects on savanna  
767 and forest systems. *The American Naturalist* 180:211--224.
- 768 Strogatz, S. H. 2014, *Nonlinear dynamics and chaos: with applications to physics, biology,*

- 769 chemistry, and engineering, Westview press.
- 770 Swaine, M. D., W. D. Hawthorne, and T. K. Orgle. 1992. The effects of fire exclusion on  
771 savanna vegetation at Kpong, Ghana. *Biotropica*:166--172.
- 772 Touboul, J. D., A. C. Staver, and S. A. Levin. 2018. On the complex dynamics of savanna  
773 landscapes. *Proceedings of the National Academy of Sciences*:201712356.
- 774 Trapnell, C. G. 1959. Ecological results of woodland and burning experiments in Northern  
775 Rhodesia. *The Journal of Ecology*:129--168.
- 776 Tyson, J. J., and J. P. Keener. 1988. Singular perturbation theory of traveling waves in excitable  
777 media (a review). *Physica D: Nonlinear Phenomena* 32:327--361.
- 778 van de Leemput, I. A., E. H. van Nes, and M. Scheffer. 2015. Resilience of alternative states in  
779 spatially extended ecosystems. *PloS one* 10:e0116859.
- 780 Van Geest, G. J., H. Coops, M. Scheffer, and E. H. Van Nes. 2007. Long transients near the  
781 ghost of a stable state in eutrophic shallow lakes with fluctuating water levels.  
782 *Ecosystems* 10:37--47.
- 783 Van Saarloos, W. 2003. Front propagation into unstable states. *Physics reports* 386:29--222.
- 784 Veenendaal, E. M., M. Torello-Raventos, H. S. Miranda, N. M. Sato, I. Oliveras, F. van  
785 Langevelde, G. P. Asner et al. 2018. On the relationship between fire regime and  
786 vegetation structure in the tropics. *New Phytologist* 218:153—166.
- 787 Veldman, J. W., G. E. Overbeck, D. Negreiros, G. Mahy, S. Le Stradic, G. W. Fernandes, G.  
788 Durigan et al. 2015. Where tree planting and forest expansion are bad for biodiversity and  
789 ecosystem services. *BioScience* 65:1011--1018.
- 790 von Humboldt, A., and A. Bonpland. 1807, *Essai sur la géographie des plantes*.
- 791 Webb, T. 1986. Is vegetation in equilibrium with climate? How to interpret late-Quaternary  
792 pollen data. *Plant Ecology* 67:75--91.
- 793 Weissmann, H., and N. M. Shnerb. 2014. Stochastic desertification. *EPL (Europhysics Letters)*  
794 106:28004.
- 795 White, F. 1986, *La Vegetation de L'Afrique (The Vegetation of Africa)*, v. 20, IRD Editions.
- 796 Whittaker, R. H. 1970. *Communities and ecosystems*. *Communities and ecosystems*.
- 797 Wuyts, B., A. R. Champneys, and J. I. House. 2017. Amazonian forest-savanna bistability and  
798 human impact. *Nature Communications* 8.
- 799 Wuyts, B., A. R. Champneys, and J. I. House. 2018. *Fronts, Irregular Cycles and Bistability in a*

800           Reaction-Diffusion Model of Tropical Tree Cover. arXiv preprint arXiv:1803.07535.

801   Zelnik, Y. R., and E. Meron. 2018. Regime shifts by front dynamics. *Ecological Indicators*.

802

803

804 **FIGURES**

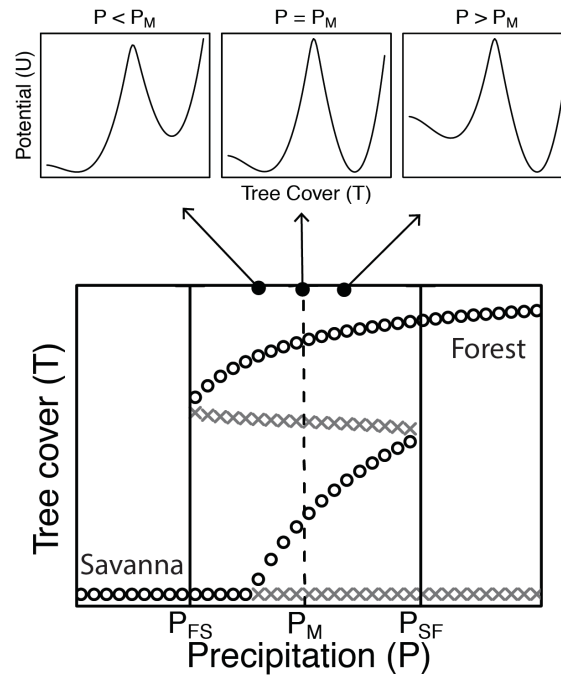

805  
806 **Figure 1:** Potential functions of different vegetation configurations (top) and bifurcation diagram  
807 of the mean-field reaction term (bottom). In the intermediate precipitation region (bounded by  
808 the critical precipitation values  $P_{FS}$  and  $P_{SF}$ ), the bifurcation diagram shows that the system can  
809 exist in both savanna and forest states, depending upon the initial conditions. In the bistable  
810 region, the depth of the potential function (U in the top row) corresponding to savanna and forest  
811 states depends on the precipitation value. Both savanna and forest states have equal potential at a  
812 unique precipitation value, referred to as Maxwell precipitation ( $P_M$ ). Below (above)  $P_M$ ,  
813 savanna (forest) state has a deeper potential than forest. In the bottom panel, stable (unstable)  
814 equilibrium points are marked as black circles (dark-grey crosses).

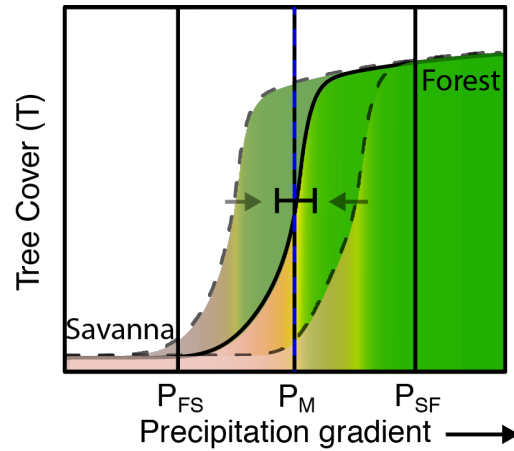

815

816 **Figure 2:** Equilibrium (solid sigmoidal curve) and transient (dash sigmoidal curve) tree cover  
817 along a linear spatial precipitation gradient in a 1D landscape. The two solid vertical lines  
818 correspond to the two critical points ( $P_{FS}$  and  $P_{SF}$ ), and the vertical black dashed line to the  
819 Maxwell precipitation ( $P_M$ ). The plot suggests that spatial interactions coupled with a large-scale  
820 gradient in precipitation can result in the spatial aggregation of savanna and forest, separated by  
821 a stable savanna-forest boundary (indicated by the blue vertical line, in this case coincident with  
822  $P_M$ ). This boundary is resilient to perturbations and always recovers back to its equilibrium  
823 position after a disturbance. This model, however, fails to reproduce the non-deterministic  
824 relationship between biome and precipitation, observed in the empirical data. The simulations  
825 were initialized with random initial condition (see Numerical Methods in Online Appendix D).

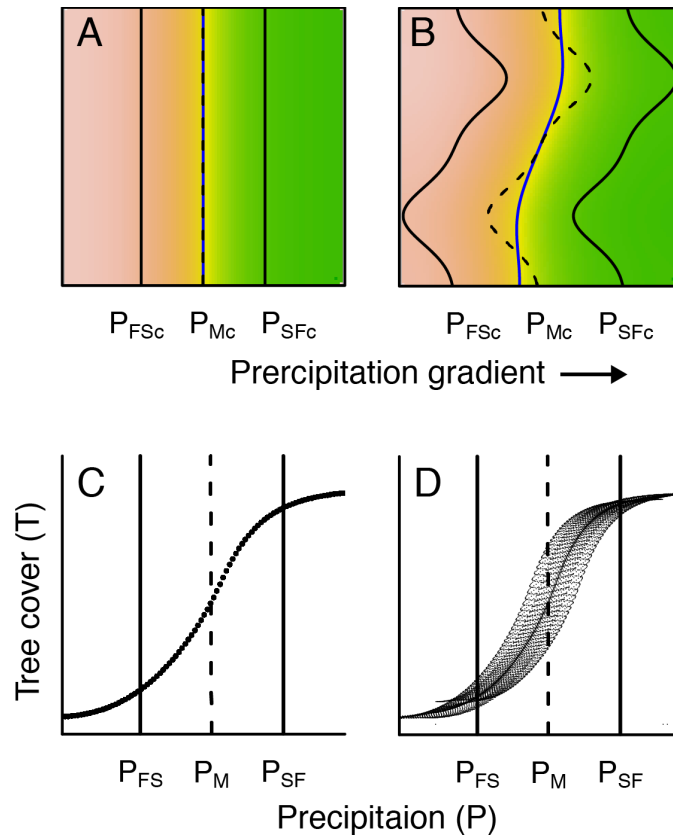

826  
 827 **Figure 3:** Simulated equilibrium distribution of tree cover (A and B) and its relationship with  
 828 precipitation (C and D) in a 2D landscape with a monotonic precipitation gradient. The columns  
 829 show the results for two geometries of precipitation contours: linear (A and C) and curved (B and  
 830 D). Simulations suggest that in a 2D landscape, the equilibrium position of the boundary is not  
 831 only determined by  $P_M$ , but also depends on the curvature of the Maxwell precipitation contour  
 832  $\kappa_{Mc}$ . When  $\kappa_{Mc} = 0$  (linear  $P_{Mc}$ ), the boundary aligns with  $P_{Mc}$  (A). This situation is  
 833 analogous to the one-dimensional model in figure 2. However, when  $\kappa_{Mc} \neq 0$  (arbitrary shaped  
 834  $P_{Mc}$ ), the boundary deviates from  $P_{Mc}$  according to equation (7) (B). These curvature effects  
 835 can reproduce the non-deterministic relationship between biome and precipitation (D), missing in  
 836 the one-dimensional model (Fig. 2). The simulations were initialized with random initial  
 837 condition (see Numerical Methods in Online Appendix D).

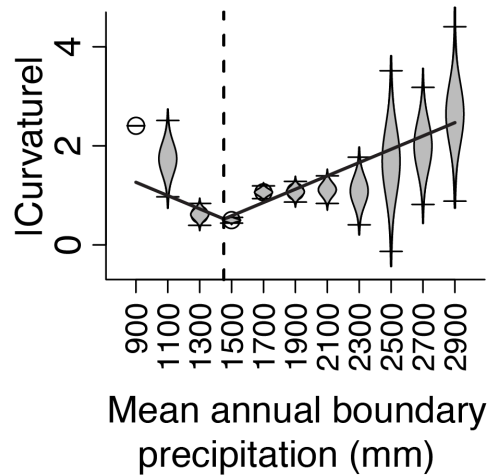

838

839 **Figure 4:** Empirical response of local savanna-forest boundary curvature to mean annual  
840 precipitation at the boundary in sub-Saharan Africa. Results show that absolute curvature vs.  
841 boundary precipitation exhibit V-shaped relationship (black line), consistent with our theoretical  
842 prediction (eq. 7). In theory, the vertex of V corresponds to  $P_M$ , loosely corresponding to results  
843 from the extensive sensitivity analysis that estimates  $P_M = 1508 \pm 84$  MAP (Fig. D3; see Data  
844 Analysis in Online Appendix D).



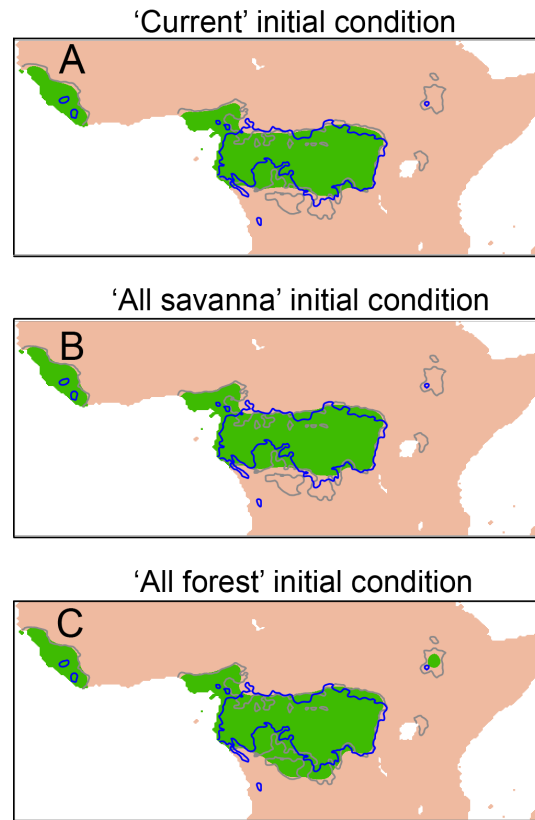

845

846 **Figure 5:** Simulated distributions of savanna and forest in Africa, initialized with the current  
847 distribution of biomes (A), all savanna (B), and all forest (C). Blue lines correspond to the  
848 observed present-day savanna-forest boundary, and the grey line represents  $P_{Mc}$  (with  $P_M =$   
849 1538 mm MAP). The large-scale simulations in (A) and (B) matched, and reproduced the  
850 current distribution of savanna and forest, except the edaphic savannas on the Bateke Plateau in  
851 Congo and deforested areas in western Africa. However, the simulations in (C) significantly  
852 overpredicted the extent of forest in the Southern Congo. This region can climatically support  
853 both savanna and forest depending upon the historical vegetation state of the region (see Data  
854 Analysis in Online Appendix D).

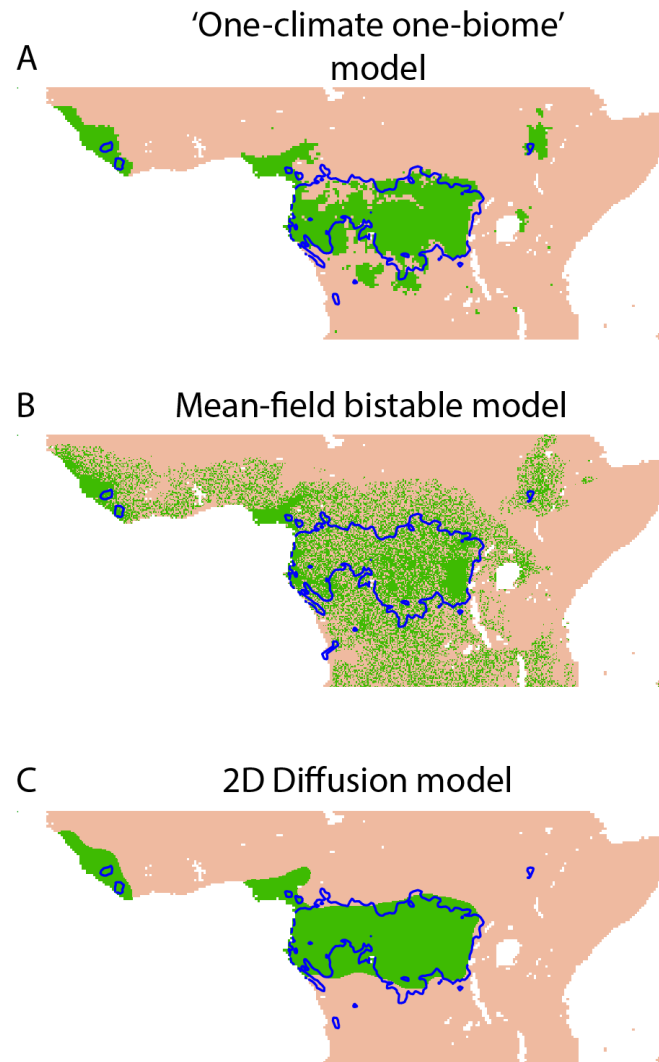

855

856 **Figure 6:** Simulated distribution of savanna and forest biomes from three biome distribution  
857 models: 'one-climate one-biome' model (A), mean-field bistable model (B), 2D  
858 reaction-diffusion model (C). Blue lines correspond to the present-day savanna-forest boundary.  
859 These results indicate that the 2D reaction-diffusion model can, with tuning, describe the  
860 quantitative distribution of biome patterns. This model reproduces both spatial aggregation and  
861 overlap in rainfall ranges of biomes and is also the best predictor of biome patterns in Central  
862 Africa (see Table 1 and Data Analysis in Online Appendix D).

**Table 1:** Summary statistics of the simulated distribution of biomes in Central Africa using three alternative models. The performance of models was evaluated on three aspects: overlap in the rainfall ranges of biomes (columns 2 and 3), spatial aggregation of savanna with savanna and forest with forest (columns 4 and 5), and match between the simulated and actual distribution of biomes (columns 6, 7, and 8). Note that we excluded the contributions of the deforested regions in Western Africa and edaphic savannas of Bateke Plateau while calculating the goodness of fit (see Data Analysis in Online Appendix D).

| Model                         | Rainfall range (mm MAP) |            | Spatial aggregation                              |                                                | Goodness of fit (%)  |                                   |                                  |
|-------------------------------|-------------------------|------------|--------------------------------------------------|------------------------------------------------|----------------------|-----------------------------------|----------------------------------|
|                               | Savanna                 | Forest     | Probability of finding savanna next to a savanna | Probability of finding forest next to a forest | Correctly classified | Incorrectly classified as savanna | Incorrectly classified as forest |
| 'One-climate one-biome' model | Below 1583              | Above 1583 | 0.96                                             | 0.90                                           | 93.43                | 3.09                              | 3.48                             |
| Mean-field bistable model     | Below 2000              | Above 1000 | 0.68                                             | 0.36                                           | 78.90                | 5.49                              | 15.61                            |
| 2D diffusion model            | Below 2042              | Above 1058 | 0.97                                             | 0.96                                           | 97.00                | 1.24                              | 1.76                             |
